# Supplementary material for: Characteristics of Diagnosed and Death Cases of Pneumoconiosis in Hubei Province, China, 1949–2019
Source: MDPI journal article supplement (doi:10.3390/ijerph192315799), 2022-11-27
Supplement: s1 [file s1]

## SUPPLEMENTAL MATERIAL

### Characteristics of Diagnosed and Death Cases of Pneumoconiosis in Hubei Province, China, 1949-2019

Yuxin Yao <sup>1,2,†</sup>, Tingting Wei <sup>3,†</sup>, Hai Zhang <sup>3</sup>, Yujia Xie <sup>1,2</sup>, Pei Gu <sup>1,2</sup>, Yongxiang Yao <sup>3</sup>, Xin Xiong <sup>3</sup>, Zhe Peng <sup>3</sup>, Zhong Zhen <sup>3</sup>, Sheng Liu <sup>3</sup>, Xiuqing Cui <sup>3</sup>, Liangying Mei <sup>3,\*</sup> and Jixuan Ma <sup>1,2,\*</sup>

<sup>1</sup> Department of Occupational and Environmental Health, School of Public Health, Tongji Medical College, Huazhong University of Science and Technology, Wuhan 430030, China

<sup>2</sup> Key Laboratory of Environment and Health, Ministry of Education and Ministry of Environmental Protection, and State Key Laboratory of Environmental Health (Incubating), School of Public Health, Tongji Medical College, Huazhong University of Science and Technology, Wuhan 430030, China

<sup>3</sup> Institute of Health Surveillance, Analysis and Protection, Center for Disease Control and Prevention of Hubei Province, Wuhan 430030, China

\* Correspondence: hbcdecmy@126.com (L.M.); maj@hust.edu.cn (J.M.)

† These authors contributed equally to this work.

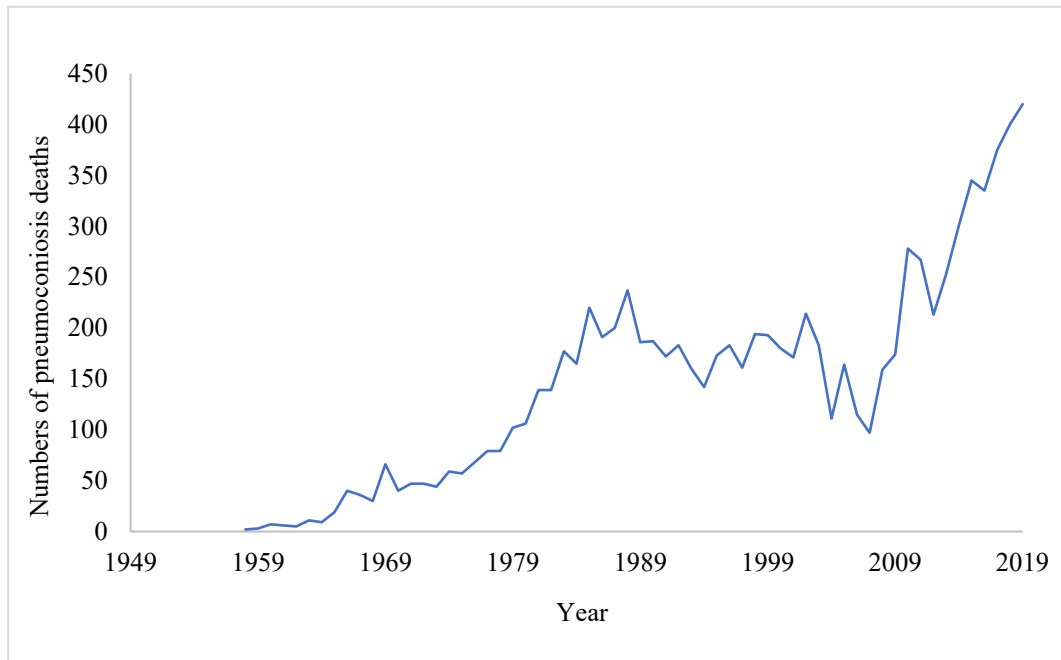

**Figure S1.** Numbers of pneumoconiosis deaths in Hubei province, China, 1949-2019.

**Table S1.** Causes of Death in Pneumoconiosis Cases and Corresponding ICDs (n = 10,993).

| Cause of Death                              | ICDs                                                                                                          | Number |
|---------------------------------------------|---------------------------------------------------------------------------------------------------------------|--------|
| Tuberculosis                                | A15-A16, B90                                                                                                  | 15     |
| Diseases of other systems                   | A41, B18-B24, B94, E10-E14, E85, F03, F10, G30-G93, I12-I13, I72-I99, K25-K92, M06-N32, P10, R0-R65, T28, T60 | 112    |
| Other malignant tumors                      | C04-C96, D00-D80                                                                                              | 249    |
| Tumors in the lung                          | C34, C38, D02, K74                                                                                            | 209    |
| Cardiovascular and cerebrovascular diseases | I00-I11, I14-I25, I28-I71                                                                                     | 485    |
| Pulmonary heart disease                     | I26-I27                                                                                                       | 36     |
| Acute respiratory infection                 | J00-J22                                                                                                       | 15     |
| Chronic respiratory infection               | J41-J42                                                                                                       | 8      |
| Emphysema                                   | J43, J98                                                                                                      | 27     |
| Chronic obstructive pulmonary disease       | J44                                                                                                           | 164    |
| Other lung diseases                         | J45-J98, R06                                                                                                  | 21     |
| Pneumoconiosis                              | J60-J65                                                                                                       | 600    |
| Respiratory failure                         | J96                                                                                                           | 35     |
| Unexplained death                           | R98-R99, Y34, Y86                                                                                             | 8,959  |
| Injury                                      | V01-X80                                                                                                       | 58     |

Abbreviation: ICD-10-CM, International Classification of Diseases, Tenth Revision, Clinical Modification.
